# Supplementary material for: Papillomavirus-Associated Tumor Formation Critically Depends on c-Fos Expression Induced by Viral Protein E2 and Bromodomain Protein Brd4
Source: PubMed Central journal article supplement (PMC4699637; doi:10.1371/journal.ppat.1005366), 2016-01-04
Supplement: ppat.1005366.s009.pdf [file ppat.1005366.s009.pdf]

**Supplemental Table 2: Oligonucleotides used in this study**

| Primer Name                   | Sequence (5`-3`)                                               |
|-------------------------------|----------------------------------------------------------------|
| <b>qRT-PCR</b>                |                                                                |
| cFos Promoter E2BS for        | AAGCTGGTCTCGAACTCCTG                                           |
| cFos Promoter E2BS rev        | CCATGACTGCCATTCAACAAC                                          |
| cFos Promoter AP1BS -4756 for | GTGGCATGTGTGTGTGTGTG                                           |
| cFos Promoter AP1BS -4756 rev | TCCACAATTCCTGTGGGACT                                           |
| cFos Promoter FAP1 -249 for   | GAGCAGTTCCCGTCAATCC                                            |
| cFos Promoter FAP1 -249 rev   | AGCATTTTCGCAGTTCCTGTC                                          |
| Alpha-tubulin o.c. for        | GCTTCTTGTTTTCCACAGC                                            |
| Alpha-tubulin o.c. rev        | GGTGGTGAGGATGGAGTTGT                                           |
| PGK (human) sense             | CTGTGGGGGTATTTGAATGG [1]                                       |
| PGK (human) antisense         | CTTCCAGGAGCTCCAAACTG [1]                                       |
| cFos o.c. for                 | CTTCCTGTTCCAGCATCAT                                            |
| cFos o.c. rev                 | GGGGTAGGTGAAGACCAAGG                                           |
| <b>EMSA</b>                   |                                                                |
| dAP CRPV URR WT sense         | GCATGCGATGACACATTACAC                                          |
| dAP WT CRPV URR comp          | CGTACGCTACTGTGTAATGTG                                          |
| dAP CRPV URR mut sense        | GCATGCGACATATGTTACAC                                           |
| dAP CRPV URR mut comp         | CGTACGCTGTATAACAATGTG                                          |
| <b>Cloning</b>                |                                                                |
| AP-MMP9 rev                   | TCGACTGACTCATGACTCATGACTCATGACTCATGACTCATGACTCATGACTCAA        |
| AP-MMP9 for                   | AGCTTTGAGTCATGAGTCATGAGTCATGAGTCATGAGTCATGAGTCATGAGTCAG        |
| AP-CRE for                    | AGCTTTGACGTCATGACGTCATGACGTCATGACGTCATGACGTCATGACGTCATGACGTCAG |
| AP-CRE rev                    | TCGACTGACGTCATGACGTCATGACGTCATGACGTCATGACGTCATGACGTCATGACGTCAG |
| dAP-CRPV for                  | AGCTTTGACACATGACACATGACACATGACACATGACACATGACACATGACACAG        |
| dAP-CRPV rev                  | TCGACTGTGTCATGTGTCATGTGTCATGTGTCATGTGTCATGTGTCATGTGTCAG        |
| pAP-CRPV for                  | GCTTTGACTCATGACTCATGACTCATGACTCATGACTCATGACTCATGACTCAG         |
| pAP-CRPV rev                  | TCGACTGAGTCATGAGTCATGAGTCATGAGTCATGAGTCATGAGTCATGAGTCAG        |
| mdAP1-CRPV for                | GCACCCGGTGGCATGCGACATATGTTACACAGTAAGCCTTGAGAG                  |
| mdAP1-CRPV rev                | CTCTCAAGGCTTACTGTGTAACATATGTCGCATGCCACCGGGTGC                  |
| mpAP1-CRPV for                | GGTGTGCATGACTGTAAGTATGCGGCCGCCACCGCATGCGGTGTTATG               |
| mpAP1-CRPV rev                | CATAACACCGCATGCGGTGGCGGCCGCATACTTACAGTCATGCACACC               |

## Supplemental Table 2 (continued)

| Primer Name  | Sequence (5`-3`)                                              |
|--------------|---------------------------------------------------------------|
| shBrd4-1 for | GATCCCCTGAGCACAAATCAAGTCTAATTCAAGAGATTAGACTTGATTGTGCTCATTTTTG |
| shBrd4-2 for | GATCCCCGCGCTTGGAAAACAACTATTTCAAGAGAATAGTTGTTTTCCAAGCGCTTTTG   |
| shMEK1-1 for | GATCCCCGATCAAGTCCTGAAGAAAttcaagagaTTTCTTCAGGACTTGATCCTTTTA    |
| shMEK1-2 for | GATCCCCAGCTTATTCACCTGGAGATttcaagagaATCTCCAGGTGAATAAGCTTTTTTA  |

<sup>1</sup> Reiser, J., Hurst, J., Voges, M., Krauss, P., Munch, P., Iftner, T., and Stubenrauch, F. (2011). High-risk human papillomaviruses repress constitutive kappa interferon transcription via E6 to prevent pathogen recognition receptor and antiviral-gene expression. *Journal of virology* 85, 11372-11380.
