# Supplementary material for: Papillomavirus-Associated Tumor Formation Critically Depends on c-Fos Expression Induced by Viral Protein E2 and Bromodomain Protein Brd4
Source: PubMed Central journal article supplement (PMC4699637; doi:10.1371/journal.ppat.1005366), 2016-01-04
Supplement: ppat.1005366.s010.pdf [file ppat.1005366.s010.pdf]

| Target protein                     | Company        | Order number | Dilution     |
|------------------------------------|----------------|--------------|--------------|
| <b>Western blot</b>                |                |              |              |
| <b>Gal4-HRP</b>                    | Santa Cruz     | sc-510       | 1:1000       |
| <b>MEK1</b>                        | Santa Cruz     | sc-6250      | 1:1500       |
| <b>GAPDH</b>                       | Santa Cruz     | sc-20357     | 1:1000       |
| <b>HSP90</b>                       | Santa Cruz     | sc-69703     | 1:1000       |
| <b><math>\alpha</math>-tubulin</b> | Calbiochem     | CP06         | 1:1500       |
| <b>HA</b>                          | Covance        | MMS-101P     | 1:1000       |
| <b>c-Fos</b>                       | Cell Signaling | #2250        | 1:1000       |
| <b>ChIP</b>                        |                |              |              |
| <b>Brd4</b>                        | [2]            |              | 2 $\mu$ l/IP |
| <b>HA</b>                          | abcam          | ab9110       | 2 $\mu$ l/IP |
| <b>c-Fos</b>                       | Cell Signaling | #2250        | 2 $\mu$ l/IP |
| <b>FosB</b>                        | Santa Cruz     | sc48 X       | 2 $\mu$ l/IP |
| <b>cJun</b>                        | Santa Cruz     | sc1694 X     | 2 $\mu$ l/IP |
| <b>JunB</b>                        | Santa Cruz     | sc46 X       | 2 $\mu$ l/IP |
| <b>JunD</b>                        | Santa Cruz     | sc74 X       | 2 $\mu$ l/IP |

<sup>2</sup> Wu, S.Y., Lee, A.Y., Hou, S.Y., Kemper, J.K., Erdjument-Bromage, H., Tempst, P., and Chiang, C.M. (2006). Brd4 links chromatin targeting to HPV transcriptional silencing. *Genes & development* 20, 2383-2396.
